# Supplementary material
Source: MDPI journal article supplement (https://www.mdpi.com/2072-4292/13/9/1687)
Supplement: s1 [file s1 › remotesensing-1169921-SI.pdf]

# **Seasonal and Diurnal Variations in Cloud-top Phase over the Western North Pacific during 2017-2019**

**Xiaoyong Zhuge, Xiaolei Zou, Xin Li, Fei Tang, Bin Yao and Lu Yu**

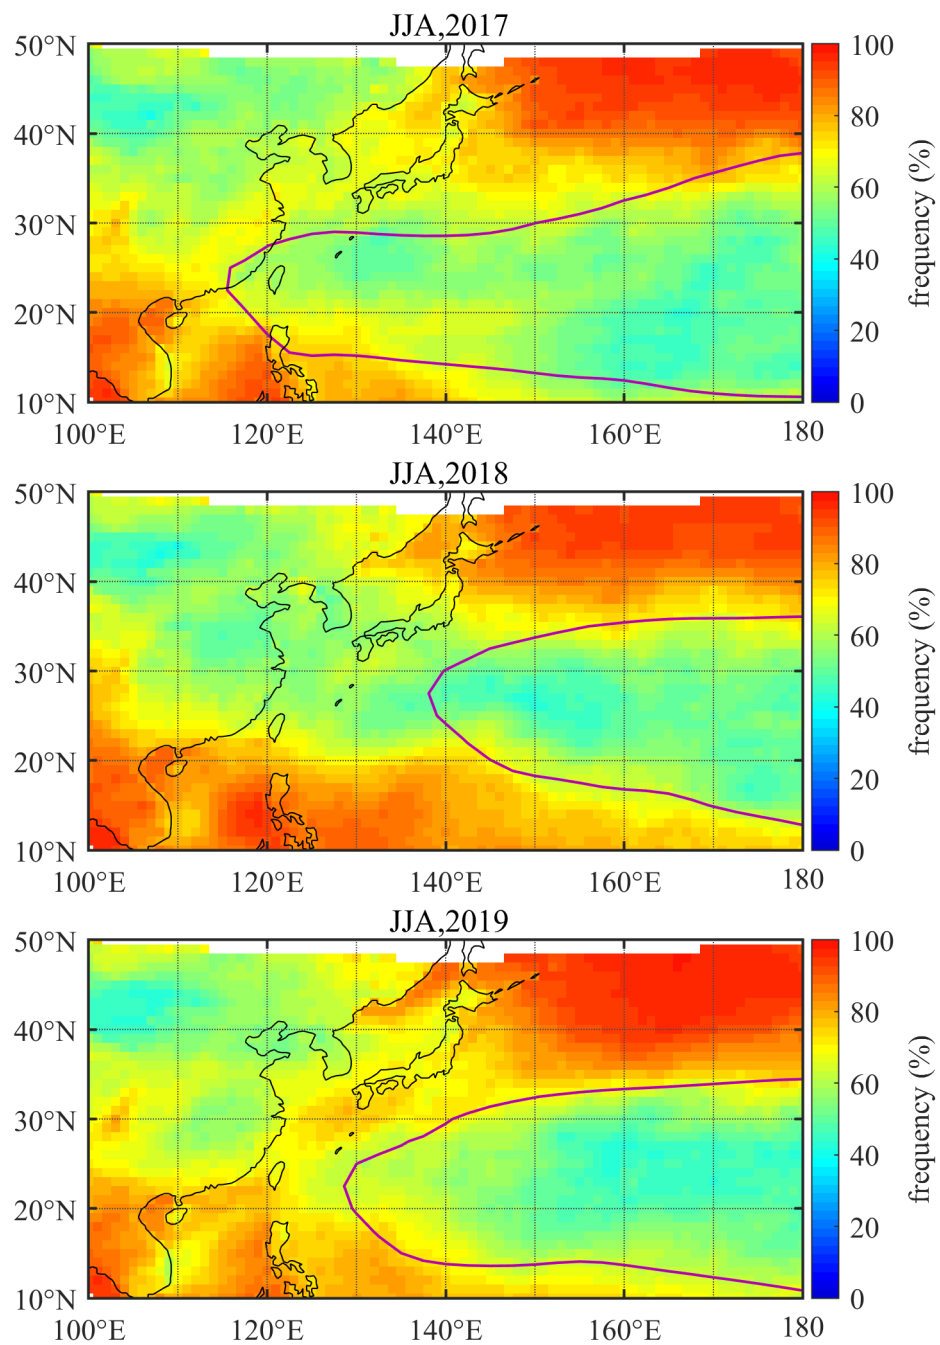

**Figure S1.** 1°×1° Gridded frequency distributions of any-phase clouds (shading, unit: %) and seasonally averaged boundaries of the WPSH systems (purple solid curves) in the summer of 2017, 2018, and 2019, respectively.

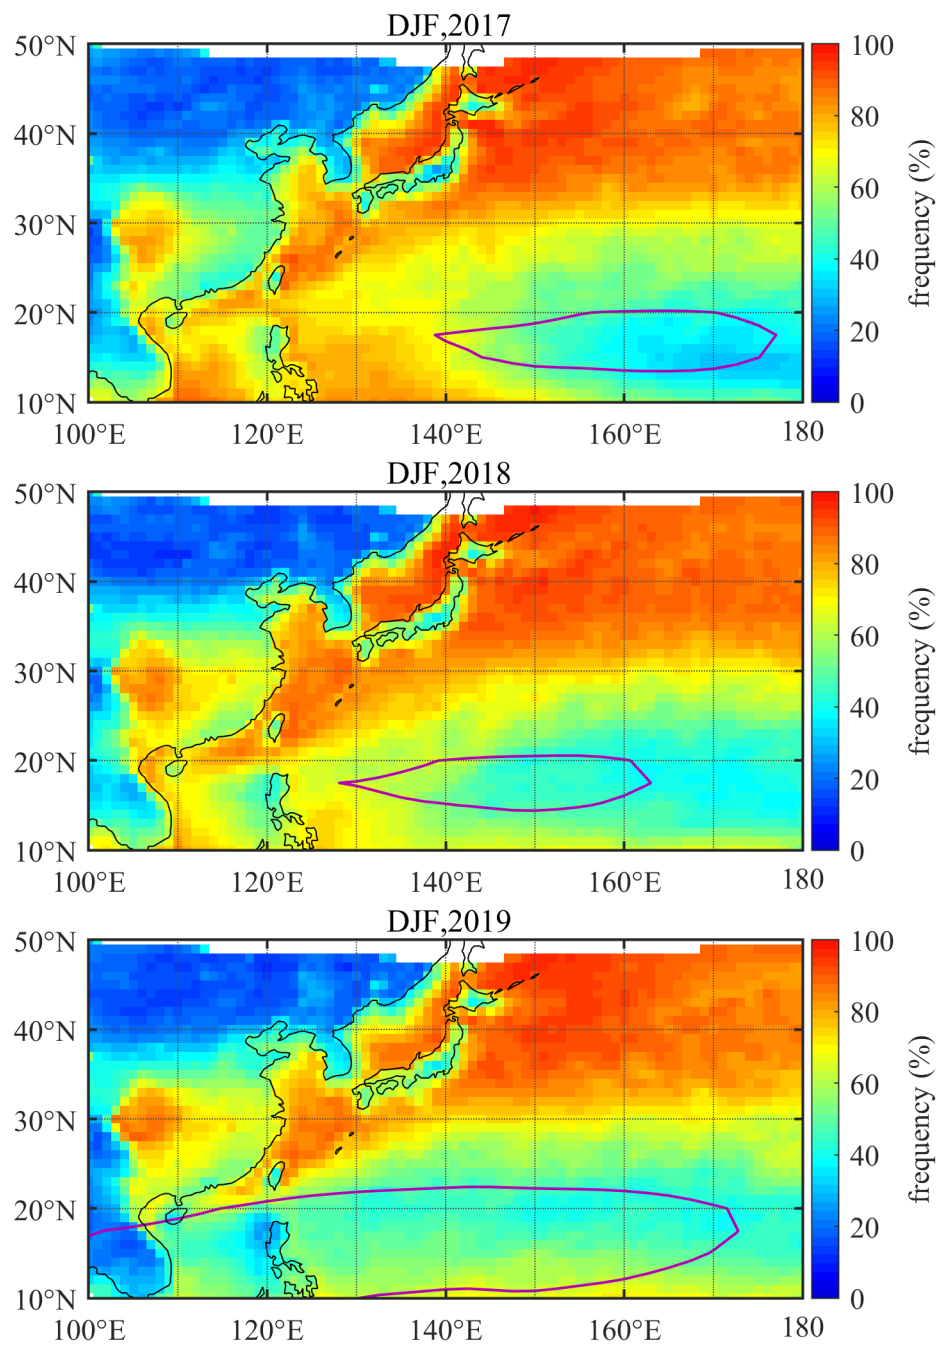

**Figure S2.** Same as Fig. S1, except for winter.
